# Supplementary material for: Enhanced photoactive performance of three-layer structured Ag/Cu2O/TiO2 composites with tunable crystal microstructures
Source: Royal Society of Chemistry journal article supplement (doi:10.1039/d3ce00027c), 2023-01-01
Supplement: d3ce00027c1.pdf [file d3ce00027c1.pdf]

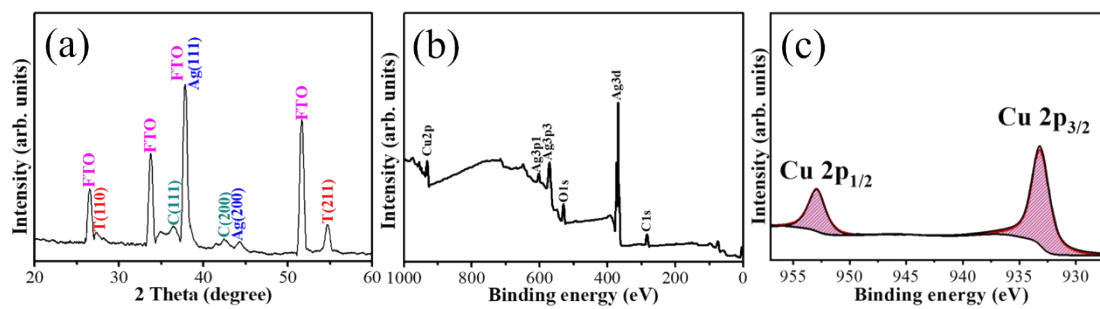

Fig. S1 Structure and chemical binding energy of the CTA 100 after five consecutive photodergadation cycles. (a) XRD pattern. (b) XPS survey scan spectrum. (c) XPS Cu 2p spectrum.
